# Supplementary material for: Decomposition of skill scores for conditional verification: impact of Atlantic Multidecadal Oscillation phases on the predictability of decadal temperature forecasts
Source: Copernicus journal article supplement (doi:10.5194/gmd-18-361-2025), 2025-01-22
Supplement: Supplementary file 1 [file gmd-18-361-2025-supplement.pdf]

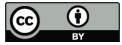

*Supplement of*

## **Decomposition of skill scores for conditional verification: impact of Atlantic Multidecadal Oscillation phases on the predictability of decadal temperature forecasts**

**Andy Richling et al.**

*Correspondence to:* Andy Richling ([andy.richling@fu-berlin.de](mailto:andy.richling@fu-berlin.de))

The copyright of individual parts of the supplement might differ from the article licence.

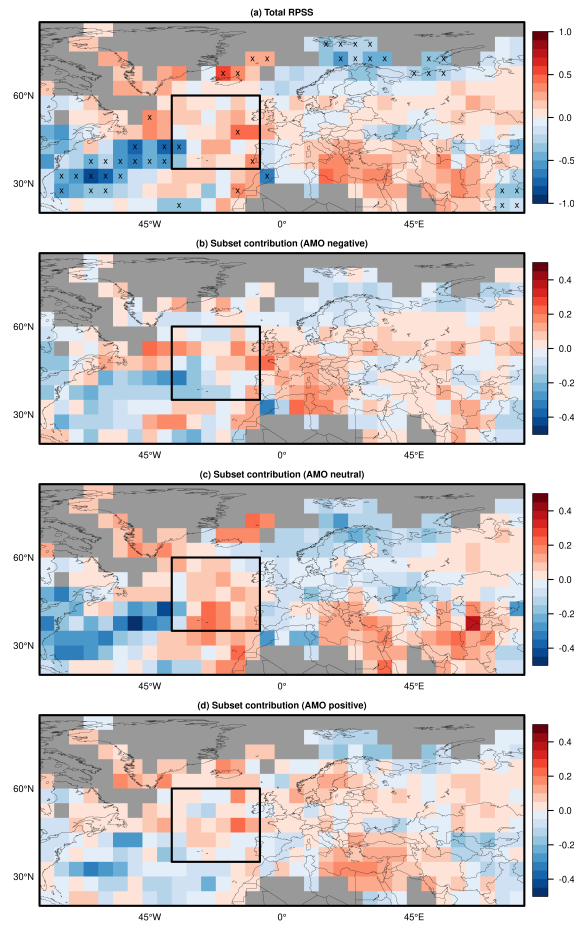

**Figure S1:** Same as Fig. 3, but using the AMO index according to Trenberth et al. (2006) to define the subsets. Without showing significant areas for subset contributions (b-d).

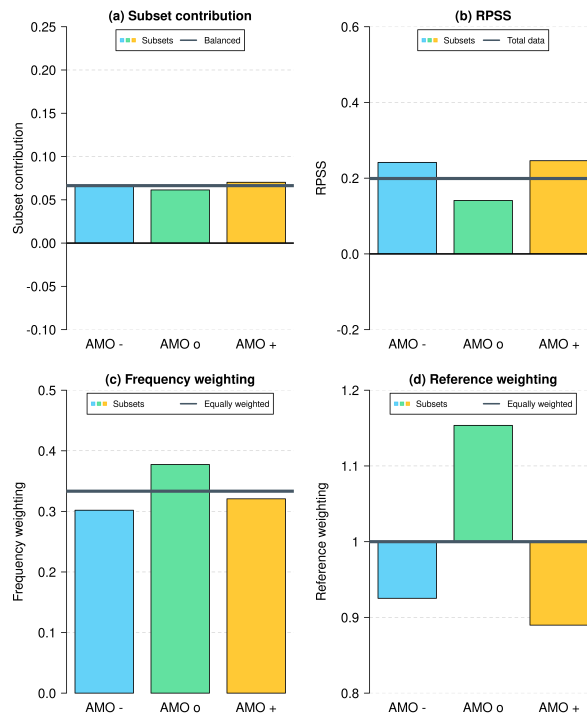

**Figure S2:** Same as Fig. 4, but using the AMO index according to Trenberth et al. (2006) and a Western European North Atlantic box slightly extended to the west (45–10° W, 35–60° N). Without showing confidence intervals.

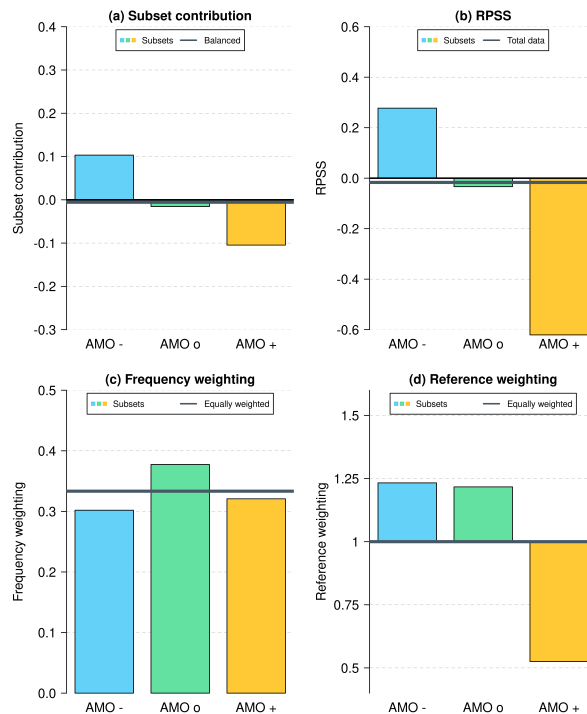

**Figure S3:** Same as Fig. 5, but using the AMO index according to Trenberth et al. (2006) and a Western European North Atlantic box slightly extended to the west (45–10° W, 35–60° N). Without showing confidence intervals.

## **Supplementary References**

Trenberth, K. E., and D. J. Shea (2006), Atlantic hurricanes and natural variability in 2005, *Geophys. Res. Lett.*, 33, L12704, doi:10.1029/2006GL026894.
